# Supplementary material
Source: PubMed Central journal article supplement (PMC4762670)
Supplement: NIHMS735485-supplement-1.pdf [file NIHMS735485-supplement-1.pdf]

## Supplementary Information

**Table 1 DNA oligos and Antibodies**

| <u>Oligo Name</u>           | <u>Oligo sequence</u>     | <u>Application</u> | <u>Ref</u> |
|-----------------------------|---------------------------|--------------------|------------|
| Control ASO                 | TAGTGCGGACCTACCCACGA      | knockdown          |            |
| mRmrp ASO1                  | GATGACGCCCCGCTGCACGC      | knockdown          |            |
| mRmrp ASO2                  | AACATGTCCCTCGTATGTAG      | knockdown          |            |
| mRmrp ASO3                  | GCGAAAGGATAAGGAACATG      | knockdown          |            |
| mRmrp ASO4                  | CTTGCGGGCTAACAGTGAC       | knockdown          |            |
| mRmrp ASO5                  | CCCCTAGGCGAAAGGATAAG      | knockdown          |            |
| hRmrp ASO                   | CGCTGAGAATGAGCCCCGTG      | knockdown          |            |
| Universal 16S F             | ACTCCTACGGGAGGCAGCAGT     | QPCR               | Ref #51    |
| Universal 16S R             | ATTACCGCGGCTGCTGGC        | QPCR               |            |
| SFB 16S F                   | GACGCTGAGGCATGAGAGCAT     | QPCR               | Ref #51    |
| SFB 16S R                   | GACGGCACGGATTGTTATTC      | QPCR               |            |
| Reg#7:<br>IL17F_Prom_ChIP_F | CCTGGGTATGTCAAACAGCAGTAG  | QPCR               | Ref #8     |
| Reg#7:<br>IL17F_Prom_ChIP_R | GAGTAGAAACCCTGCATTCGTCAG  | QPCR               |            |
| Reg#2:<br>IL17A_Prom_ChIP_F | GCAGCAGCTTCAGATATGTCC     | QPCR               | Ref #8     |
| Reg#2:<br>IL17A_Prom_ChIP_R | AGATGGGAAGGGCAGAAGTT      | QPCR               |            |
| ActB_Prom_ChIP_F            | TTTCAAAGGAGGGGAGAGG       | QPCR               |            |
| ActB_Prom_ChIP_R            | TCGAGCCATAAAAGGCAACT      | QPCR               |            |
| Reg#1 F                     | TTGCATGCGCCTCCTAACACATAG  | QPCR               |            |
| Reg#1 R                     | TTTCTAGGTGGGTTCCCTCACTGGT | QPCR               |            |
| Reg#3 F                     | AGCAAGGAATGTGGATTCAGAGGC  | QPCR               |            |
| Reg#3 R                     | ACAAACACGAAGCAGTTTGGGACC  | QPCR               |            |
| Reg#4 F                     | TCCAAGGGTGGCTGTTTATC      | QPCR               |            |
| Reg#4 R                     | CACTTCCCCGACCTCACTAA      | QPCR               |            |
| Reg#5 F                     | TCGCCTCTTGACAAACAGTG      | QPCR               |            |
| Reg#5 R                     | CACGGATTTGAGCTTCTCGT      | QPCR               |            |
| Reg#6 F                     | GTGAACGCAAGGGGTACAGT      | QPCR               |            |
| Reg#6 R                     | CCTTTGACCTTTCCCACAAA      | QPCR               |            |
| mGAPDH F                    | AATGTGTCCGTCGTGGATCT      | QPCR               |            |
| mGAPDH R                    | CATCGAAGGTGGAAGAGTGG      | QPCR               |            |
| mIL17a F                    | TTTAACTCCCTTGCGCAAAA      | QPCR               |            |
| mIL17a R                    | CTTCCCTCCGCATTGACAC       | QPCR               |            |
| mIl17f F                    | TCCCCTGGAGGATAAACTG       | QPCR               |            |
| mIl17f R                    | GGGGTCTCGAGTGATGTTGT      | QPCR               |            |
| mRmrpQPCRfwd                | CCGCAAGTCACTGTTAGCC       | QPCR               |            |

|                          |                              |                           |
|--------------------------|------------------------------|---------------------------|
| mRmrpQPCRrev             | CACTGCCTGCGTCACTATGT         | QPCR                      |
| m7SK snRNA F             | CCCTGCTAGAACCTCCAAAC         | QPCR                      |
| m7SK snRNA R             | TGGAGTCTTGAAGCTTGACT         | ChIRP-QPCR                |
| <b><u>Oligo Name</u></b> | <b><u>Oligo sequence</u></b> | <b><u>Application</u></b> |
| m18S rRNA F              | CCTGCGGCTTAATTTGACTC         | ChIRP-QPCR                |
| m18S rRNA R              | ATGCCAGAGTCTCGTTCGTT         | ChIRP-QPCR                |
| mU1 snRNA F              | TGATCACGAAGGTGGTTTTCC        | ChIRP-QPCR                |
| mU1 snRNA R              | GCACATCCGGAGTGCAATG          | ChIRP-QPCR                |
| mMalat1 F                | GATAGCCCAGGAAAGAGTGC         | ChIRP-QPCR                |
| mMalat1 R                | CCAGCTAGCTTCATCACCAA         | ChIRP-QPCR                |
| mRMRP_1_F                | GCTCTGAAGGCCTGTTTCC          | ChIRP-QPCR                |
| mRMRP_1_R                | CCCCTAGGCGAAAGGATAAG         | ChIRP-QPCR                |
| sgRNA_Rmrp_Locus         | CACGGGGCTCATTCTCAGCG         | CRISPR                    |
| HDRdonor_Rmrp            |                              | CRISPR                    |

GCTGAGCGGGCGTGCAGCGGGGCGTCATC  
CGTCAGCTCACATAGTGACGCAGGCAGTG  
CGACCTGGCTCGCACCAACCACACGGGG  
CTCATTCTCAGCGCTGCTACACTTTTATTT  
ATTTATTTTTGTTTGTGTTTGTATTTGGTTTT  
TTGACAGGGTTTCTCTGTGTAGCCCTGGC  
TGCCTGGCACTCACTTTGTAGACC

| <b><u>Antibody Name</u></b>     | <b><u>Clone/catalog number</u></b> | <b><u>Company</u></b> | <b><u>Application</u></b> |
|---------------------------------|------------------------------------|-----------------------|---------------------------|
| Anti-Mouse CD3e                 | 145-2C11                           | eBioscience           | flow                      |
| Anti-Mouse CD4                  | RM4-5                              | eBioscience           | flow                      |
| Anti-Mouse CD8                  | 53-6.7                             | eBioscience           |                           |
| Anti-Mouse CD16/32 Fc Block     | 2.4G2                              | Tonbo                 | flow                      |
| Anti-Mouse CD19                 | 1D3                                | Tonbo                 | flow                      |
| Anti-Mouse CD25                 | PC61.5                             | eBioscience           | flow                      |
| Anti-Mouse CD44                 | 1M7                                | eBioscience           | flow                      |
| Anti-Mouse TCRb                 | H57-597                            | eBioscience           | flow                      |
| Anti-Mouse gd TCR               | eBioGL3                            | eBioscience           | flow                      |
| Anti-Mouse RORgt                | B2D                                | eBioscience           | flow                      |
| Anti-Mouse/Rat Foxp3            | FJK-16s                            | eBioscience           | flow                      |
| Anti-Mouse B220                 | RA3-6B2                            | eBioscience           | flow                      |
| Anti-Mouse IL-17A               | eBio17B7                           | eBioscience           | flow                      |
| Anti-Mouse Il-17F               | 9D3.1C8                            | BioLegend             | flow                      |
| Anti-Mouse IL-22                | IL22JOP                            | eBioscience           | flow                      |
| Anti-Mouse CD196 (CCR6)         | 140706                             | BD                    | flow                      |
| Anti-Human IL-17A               | eBio64DEC17                        | eBioscience           |                           |
| Anti-Human CD4                  | OKT4                               | eBioscience           |                           |
| Anti-Human/Mouse ROR $\gamma$ t | AFKJS-9                            | eBioscience           |                           |

| <b><u>Antibody Name</u></b>     | <b><u>Clone/catalog number</u></b> | <b><u>Company</u></b> | <b><u>Application</u></b>            |
|---------------------------------|------------------------------------|-----------------------|--------------------------------------|
| Rabbit anti-βTubulin            | 2146S                              | Cell Signaling        | Immunoblot                           |
| Rabbit anti-GST                 | 2625S                              | Cell Signaling        | Immunoblot                           |
| Mouse anti-His                  | sc-8036                            | Santa Cruz Bio        | Immunoblot                           |
| Mouse anti-RNA Pol II           | 2629S                              | Cell Signaling        | ChIP                                 |
| Goat anti-DDX5                  | ab10261                            | Abcam                 | RIPseq/IP/ChIP/Immunoblot/microscopy |
| Rabbit anti-DDX5                | sc-26045                           | Santa Cruz Bio        | Immunoblot                           |
| Rat anti-RORgt                  | 14-6988-82                         | eBioscience           | RIPseq/IP/ChIP/Immunoblot/microscopy |
| Rabbit anti-GFP                 | A-11122                            | Life Technology       | RIPseq                               |
| Anti-RORgt (APC conjugated)     | AFKJS-9                            | eBioscience           | microscopy                           |
| Donkey anti-Goat Alexa Fluor488 | A-11055                            | Molecular Probe       | microscopy                           |
